# Supplementary material
Source: PubMed Central journal article supplement (PMC5392573)
Supplement: 10.1074_M116.763599_jbc.M116.763599-1.pdf [file 10.1074_M116.763599_jbc.M116.763599-1.pdf]

## Supplemental Information

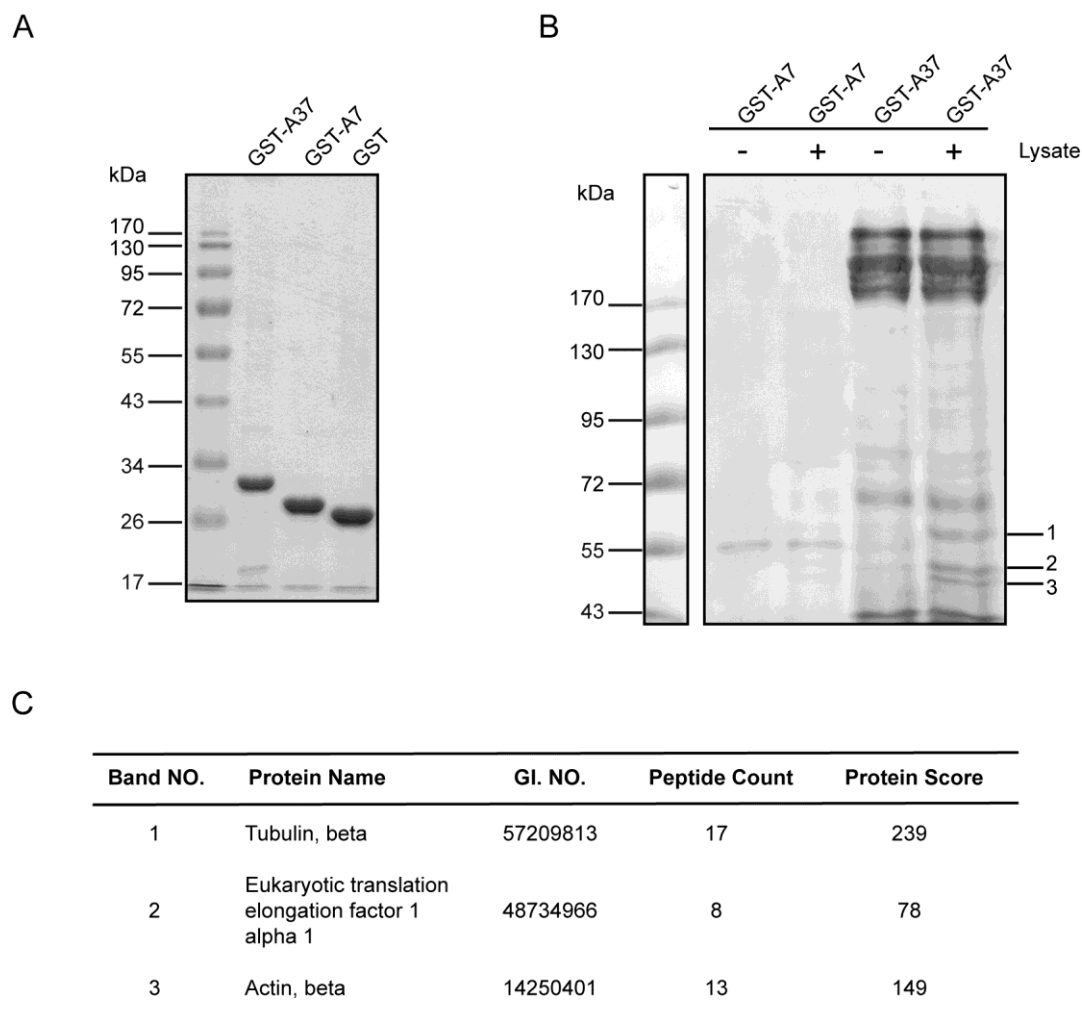

**FIGURE S1.** GST pull-down assay and mass spectrometry identified eEF1A1 as an expanded polyA protein interactor.

(A) SDS-PAGE analysis of GST-polyA expression. The GST-polyA fusion proteins were expressed in *E. coli* strain *BL21 (DE3)* and purified by Glutathione Sepharose 4 Fast Flow beads. GST-polyA proteins expression was confirmed by Coomassie blue staining. (B) GST pull-down assay identified three protein bands that were exclusively present in the GST-A37 condition. (C) Mass spectrometry was performed on band 1, 2 and 3 from (B), which were identified to be beta-tubulin, eEF1A1 and beta-actin, respectively. GI no. represents the GenBank molecular biology database identifier. Protein score (a protein with a score >36 is considered as being significant).

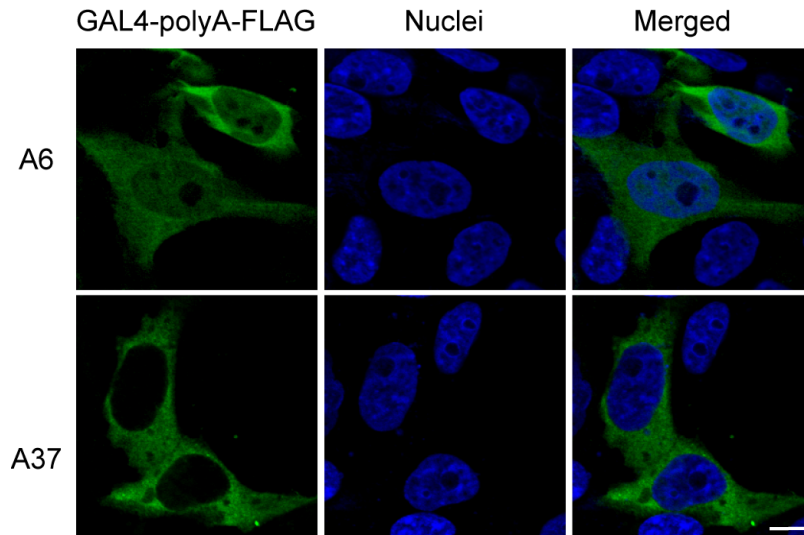

**FIGURE S2.** GAL4-A6-FLAG showed both nuclear and cytoplasmic localization while GAL4-A37-FLAG localized in cytoplasm. Subcellular localization of GAL4-polyA-FLAG proteins in HEK293 cells. HEK293 cells were transfected with *pGAL4-polyA-FLAG* constructs and stained nuclei with Hoechst 33342. GAL4-A6-FLAG showed both nuclear and cytoplasmic localization, while GAL4-A37-FLAG was detected only in the cytoplasm. Scale bar represents 10  $\mu$ m. Three independent experiments were performed.

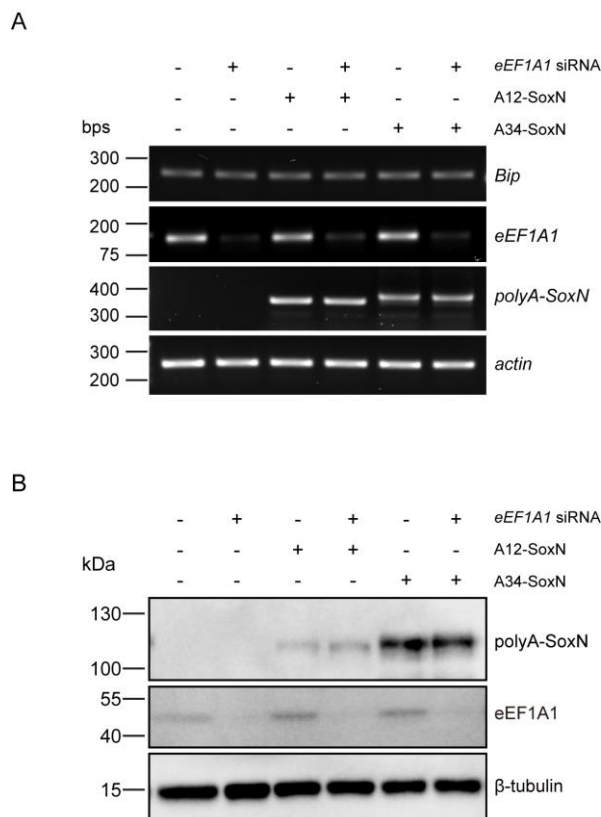

**FIGURE S3.** Knockdown of *eEF1A1* did not affect folding and degradation of

polyA-containing proteins.

(A) RT-PCR of *BiP* and *polyA-SoxN*. No changes of *BiP* or *polyA-SoxN* transcript levels were detected when *eEF1A1* was knocked down. *actin* served as the loading control. (B) Detection the expression level of polyA-SoxN using Western blotting. No changes of polyA-SoxN expression levels were detected when *eEF1A1* was knocked down.  $\beta$ -tubulin served as the loading control. Three independent experiments were performed.

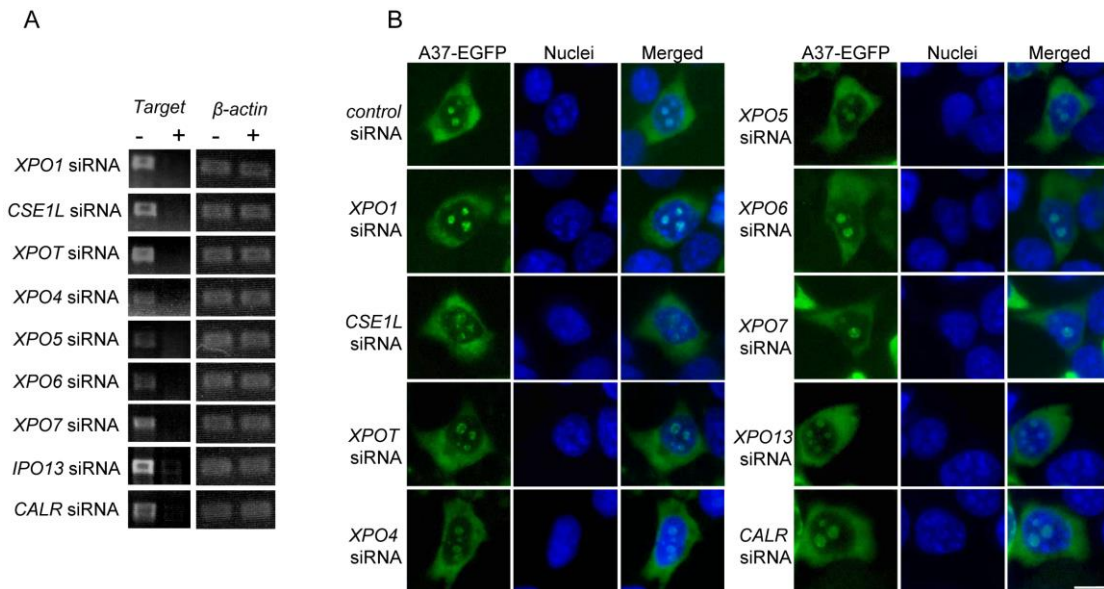

**FIGURE S4.** Knockdown of candidate genes by siRNAs did not affect nuclear export of expanded polyA tract-containing nuclear export reporter proteins.

(A) Knockdown efficiency of siRNAs used in screening of candidate genes in HEK293 cells. Compared with control siRNA (-), treatment of HEK293 cells with specific siRNA (+) caused a reduction in target gene mRNA level.  $\beta$ -actin was used as the loading control. (B) Subcellular localization of Rev(1.4)-A37-EGFP in HEK293 cells after knockdown candidate genes. The knockdown of candidate genes did not change the subcellular localization of Rev(1.4)-A37-EGFP protein. The cell nuclei were stained with Hoechst 33342. At least 100 transfected cells were analyzed. Scale bar represents 10  $\mu$ m.

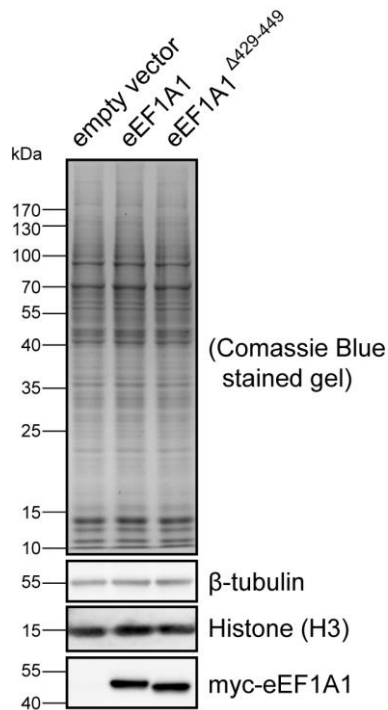

**FIGURE S5.** Overexpression of eEF1A1 did not affect protein translation. The cellular protein expression level was examined by SDS-PAGE Coomassie Blue staining. No difference was detected in the cellular protein expression levels among cells overexpressing eEF1A1, eEF1A1<sup>Δ429-499</sup> and empty vector. β-tubulin and Histone (H3) served as house-keeping protein loading controls. Three independent experiments were performed.

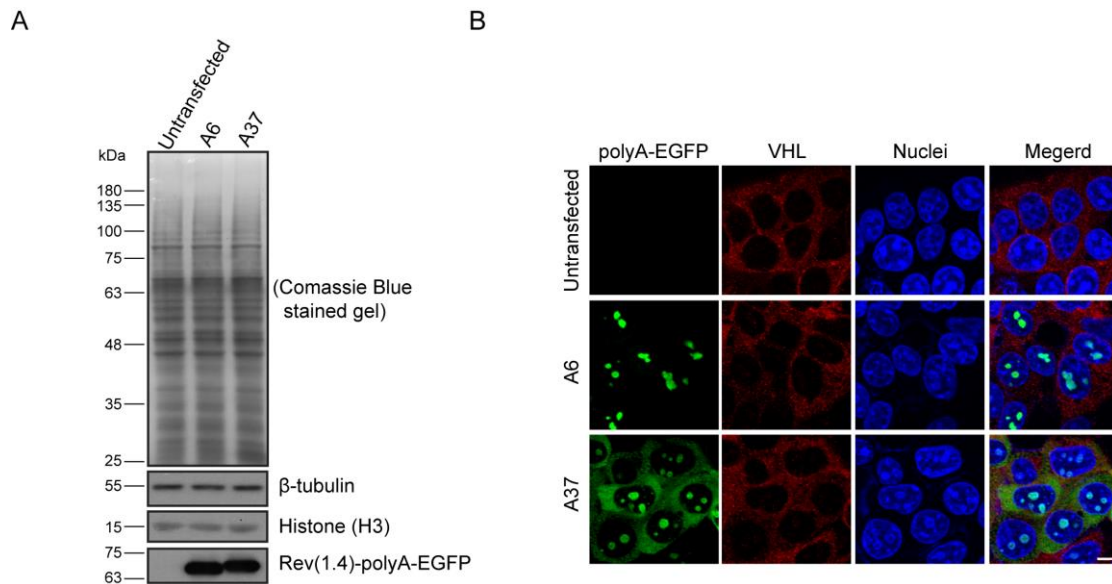

**FIGURE S6.** Expanded polyA expression did not affect the canonical cellular functions of eEF1A1.

(A) The cellular protein expression level was examined by SDS-PAGE Coomassie Blue staining. No difference was detected in the cellular protein expression between cells transfected with the *pRev(1.4)-A37-EGFP* (A37) and *pRev(1.4)-A6-EGFP* (A6) or the

untransfected control.  $\beta$ -tubulin and Histone (H3) served as house-keeping protein loading controls. (B) Subcellular localization of VHL, a nuclear export cargo of eEF1A. HEK293 cells were transiently expressing Rev(1.4)-polyA-EGFP. The cell nuclei were stained with Hoechst 33342. VHL protein showed similar cytoplasmic localization in cells expressing Rev(1.4)-A6-EGFP (A6) and Rev(1.4)-A37-EGFP (A37). Scale bar represents 10  $\mu$ m. Three independent experiments were performed.
